# Supplementary material for: Praseodymium Orthoniobate and Praseodymium Substituted Lanthanum Orthoniobate: Electrical and Structural Properties
Source: MDPI journal article supplement (doi:10.3390/ma15062267), 2022-03-18
Supplement: s1 [file s1]

# Praseodymium Orthoniobate and Praseodymium Substituted Lanthanum Orthoniobate: Electrical and Structural Properties

Kacper Dzierzgowski \*, Sebastian Wachowski, Marcin Łapiński, Aleksandra Mielewczyk-Gryn and Maria Gazda

Institute of Nanotechnology and Materials Engineering, Faculty of Applied Physics and Mathematics, Advanced Materials Centre, Gdańsk University of Technology, Narutowicza 11/12, 80-233 Gdańsk, Poland; sebastian.wachowski@pg.edu.pl (S.W.); marcin.lapinski@pg.edu.pl (M.L.); alegryn@pg.edu.pl (A.M.-G.); maria.gazda@pg.edu.pl (M.G.)

\* Correspondence: kacper.dzierzgowski@pg.edu.pl

**Table S1.** Unit cell parameters of synthesized samples of  $\text{La}_{1-x}\text{Pr}_x\text{NbO}_{4+\delta}$ .

| Sample                                                  | a (Å)    | b (Å)     | c (Å)    | $\beta$ (°) | V (Å <sup>3</sup> ) | R <sub>wp</sub> (%) | $\chi^2$ |
|---------------------------------------------------------|----------|-----------|----------|-------------|---------------------|---------------------|----------|
| $\text{LaNbO}_{4+\delta}$                               | 5.566(1) | 11.524(1) | 5.203(1) | 94.083(1)   | 332.90(1)           | 9.4                 | 4.17     |
| $\text{La}_{0.95}\text{Pr}_{0.05}\text{NbO}_{4+\delta}$ | 5.562(1) | 11.513(1) | 5.201(1) | 94.109(1)   | 332.16(1)           | 26.0                | 3.93     |
| $\text{La}_{0.9}\text{Pr}_{0.1}\text{NbO}_{4+\delta}$   | 5.558(1) | 11.505(1) | 5.198(1) | 94.115(1)   | 331.56(1)           | 15.4                | 2.13     |
| $\text{La}_{0.85}\text{Pr}_{0.15}\text{NbO}_{4+\delta}$ | 5.555(1) | 11.493(1) | 5.195(1) | 94.147(1)   | 330.81(1)           | 7.1                 | 1.82     |
| $\text{La}_{0.8}\text{Pr}_{0.2}\text{NbO}_{4+\delta}$   | 5.552(1) | 11.487(1) | 5.194(1) | 94.176(1)   | 330.65(1)           | 6.8                 | 2.49     |
| $\text{La}_{0.7}\text{Pr}_{0.3}\text{NbO}_{4+\delta}$   | 5.544(1) | 11.464(1) | 5.187(1) | 94.223(1)   | 328.77(1)           | 2.9                 | 2.56     |
| $\text{PrNbO}_{4+\delta}$                               | 5.498(1) | 11.340(1) | 5.158(1) | 94.554(1)   | 320.60(1)           | 6.9                 | 2.89     |

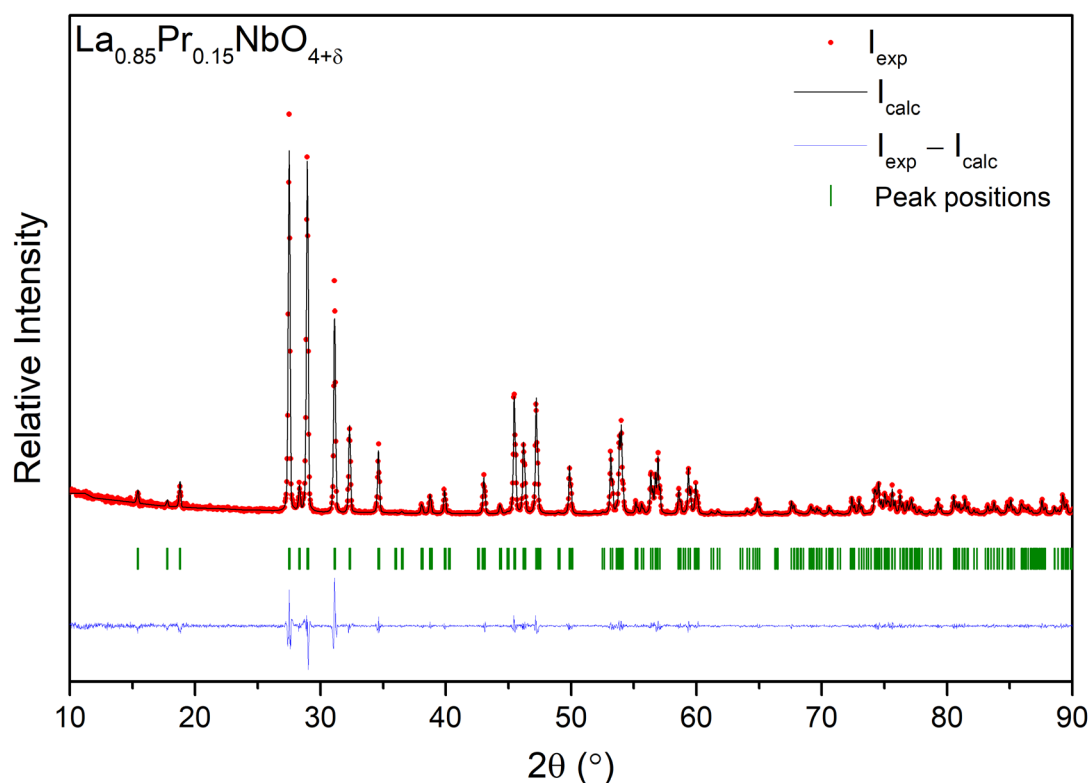

**Figure S1.** The LeBail fitted profiles of the pattern and difference plot for  $\text{La}_{0.85}\text{Pr}_{0.15}\text{NbO}_{4+\delta}$ .

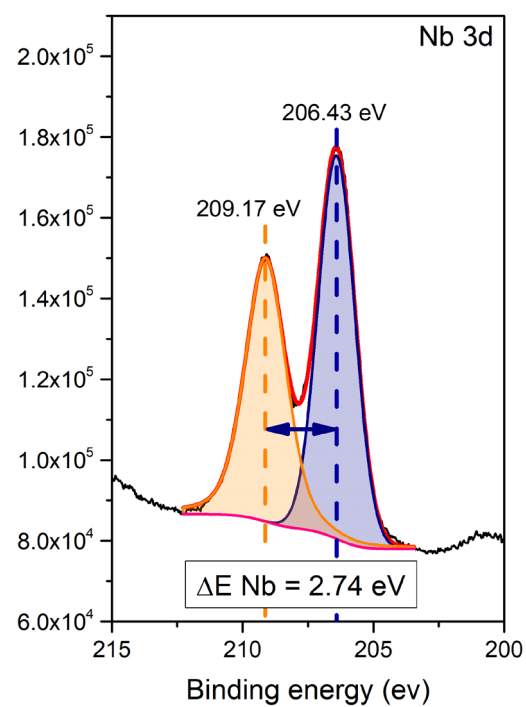

**Figure S2.** XPS spectrum of  $\text{PrNbO}_{4+\delta}$  collected for Nb 3d band.

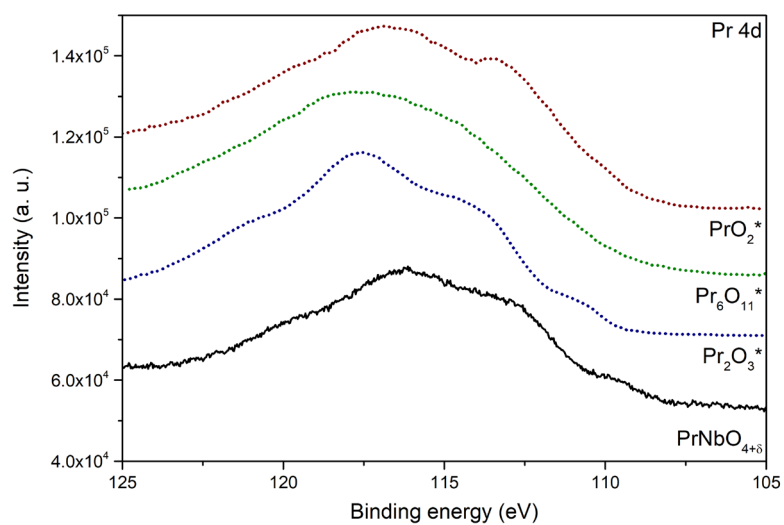

**Figure S3.** XPS spectrum collected for Pr 4d band, dotted lines represent the literature results measured for different praseodymium oxides by Lütkehoff et al. [65].

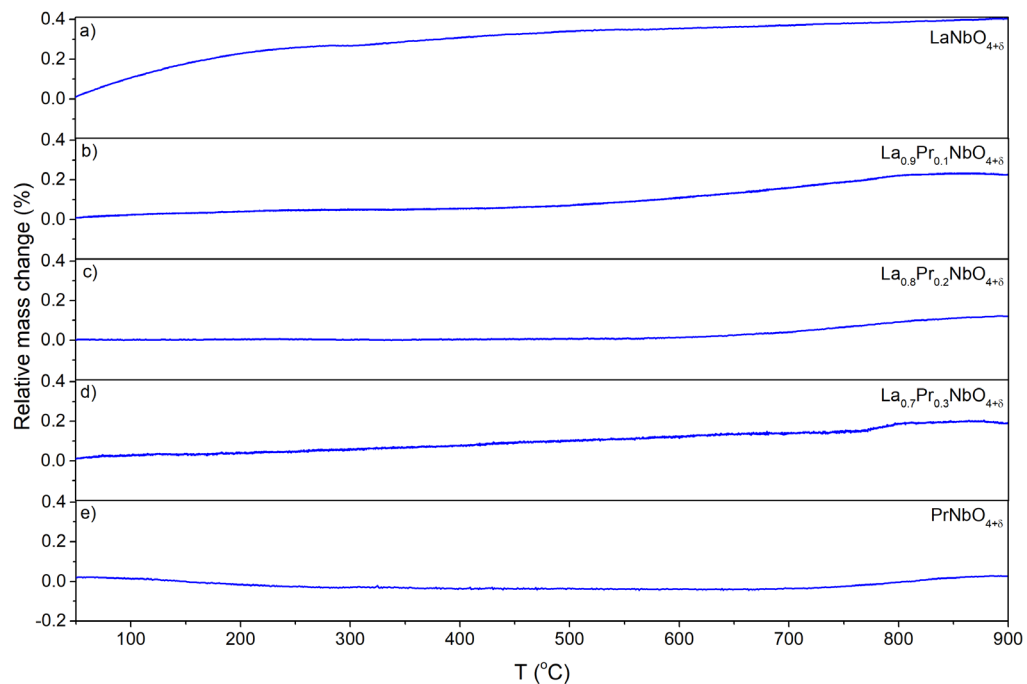

**Figure S4.** Dependence of the relative mass change of  $\text{La}_{1-x}\text{Pr}_x\text{NbO}_{4+\delta}$  from temperature in the synthetic air.

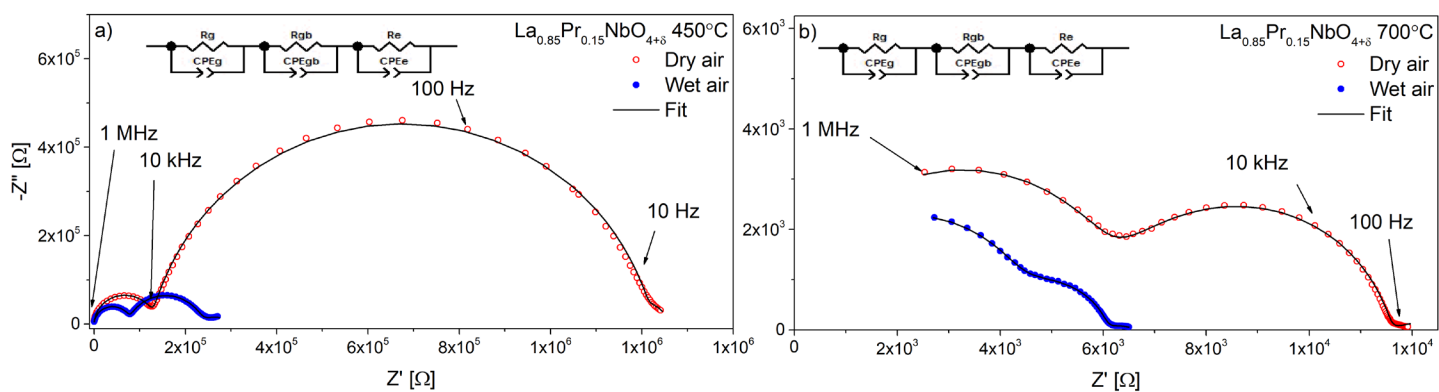

**Figure S5.** Nyquist plot acquired for  $\text{La}_{0.85}\text{Pr}_{0.15}\text{NbO}_{4+\delta}$  in dry and wet air at a) 450°C and b) 700°C.

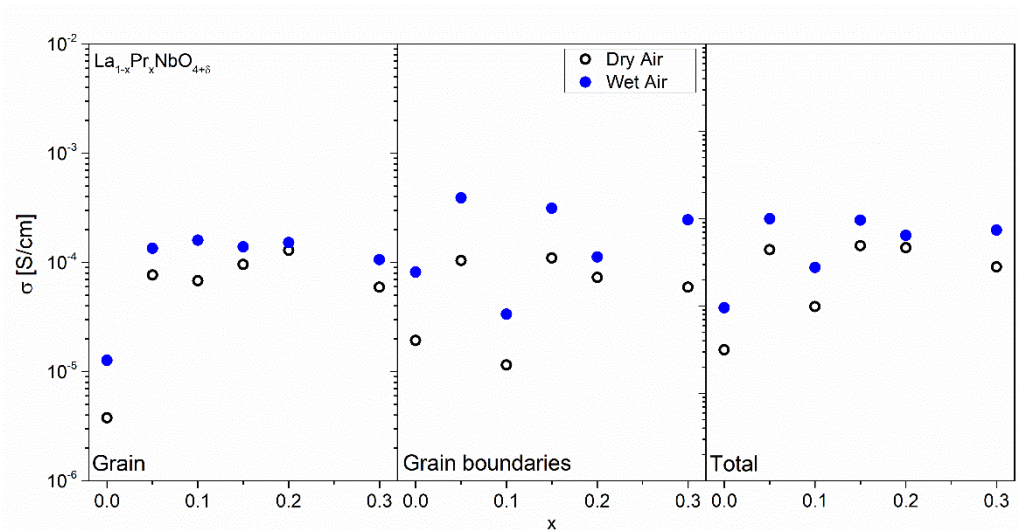

**Figure S6.** Total conductivity, grains conductivity and grain boundaries conductivity of  $\text{La}_{1-x}\text{Pr}_x\text{NbO}_{4+\delta}$  in function of praseodymium content in dry ( $p_{\text{H}_2\text{O}} = 6.0 \cdot 10^{-5}$  atm.) and wet ( $p_{\text{H}_2\text{O}} = 2.4 \cdot 10^{-2}$  atm.) air at 700°C.

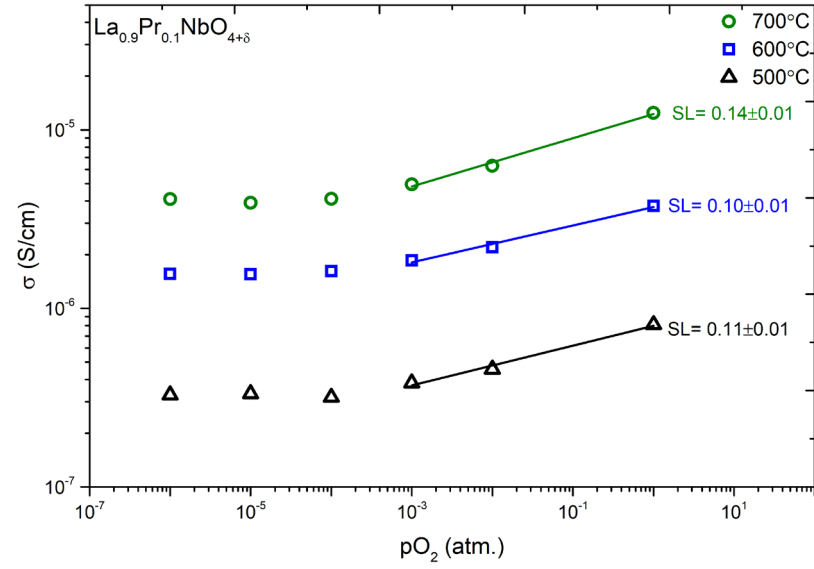

**Figure S7.** Total conductivity of  $\text{La}_{0.9}\text{Pr}_{0.1}\text{NbO}_{4+\delta}$  as a function of oxygen partial pressure in dry gases ( $p_{\text{H}_2\text{O}} = 6.0 \cdot 10^{-5}$  atm) at 500°C, 600°C and 700°C. The SL denotes the slope coefficient of the line describing the  $\log(\sigma)$  in a function of  $\log(p\text{O}_2)$ .
